# Supplementary material
Source: publisher figshare collection journal article supplement (https://acs.figshare.com/ndownloader/files/4411288)
Supplement: Supplementary file 1 [file 4411288]

# Is the Reactivity of M(II)–Arene Complexes of 3-Hydroxy-2(1*H*)-pyridones to Biomolecules the Anticancer Activity Determining Parameter?

*Muhammad Hanif,<sup>a</sup> Helena Henke,<sup>a,b</sup> Samuel M. Meier,<sup>a,b</sup> Sanela Martić,<sup>c</sup> Mahmoud Labib,<sup>c</sup> Wolfgang Kandioller,<sup>a</sup> Michael A. Jakupec,<sup>a,b</sup> Vladimir B. Arion,<sup>a,b</sup> Heinz-Bernhard Kraatz,<sup>c</sup> Bernhard K. Keppler,<sup>a,b</sup> Christian G. Hartinger<sup>a,b,\*</sup>*

<sup>a</sup> University of Vienna, Institute of Inorganic Chemistry, Waehringer Str. 42, A-1090 Vienna, Austria.

<sup>b</sup> University of Vienna, Research Platform “Translational Cancer Therapy Research”, Waehringer Str. 42, A-1090 Vienna, Austria.

<sup>c</sup> Department of Chemistry, The University of Western Ontario, London, Ontario, N6A 5B7, Canada.

## Table of contents:

Mass spectra and data for hydrolysis and amino acid binding studies

Molecular structure of **5a**

Concentration–effect curves of **1a**, **1b** and **4a** in CH1 ovarian cancer cells

CDK2/Cyclin A kinase assay data

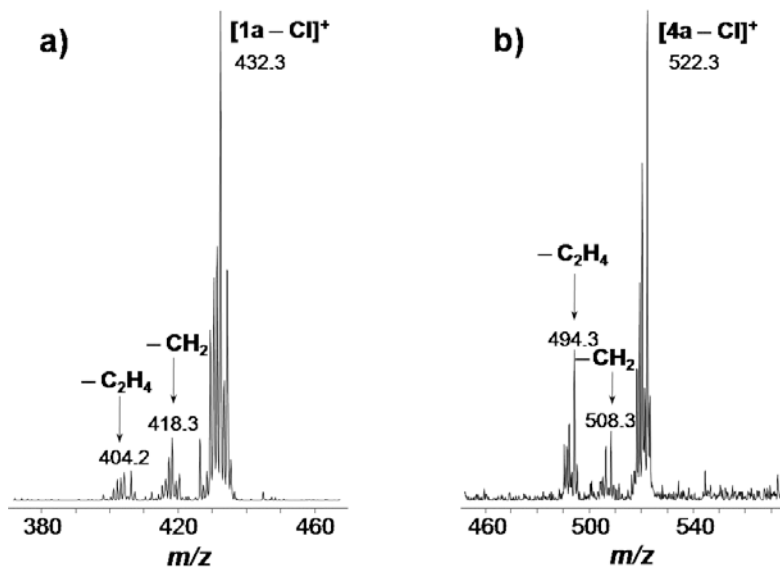

**Figure S1.** Electrospray ionization mass spectra for transesterification and hydrolysis of the ester moieties of (a) **1a** and (b) **4a** in presence of methanol and formic acid.

**Table S1.** In competitive experiments, **1a** and **4a** were incubated with Gly, His, Cys and Met at a molar ratio of 1 : 1 : 1 : 1 : 1 for 19 h and reaction mixtures were analyzed by ESI-MS (all  $m/z$  values contain standard deviations of  $\pm 0.1$ ).

| Species    | Relative abundance (%) |     | $m/z$ |       |
|------------|------------------------|-----|-------|-------|
|            | 1a                     | 4a  | 1a    | 4a    |
| Met adduct | 100                    | 100 | 384.0 | 474.3 |
| His adduct | 66                     | 96  | 390.0 | 480.3 |
| Cys adduct | 8                      | 57  | 356.0 | 446.3 |
| Gly adduct | 1                      | 0   | 310.0 | 400.2 |
| <b>1a</b>  | 8                      | -   | 432.3 | -     |
| <b>4a</b>  | -                      | 0   | -     | 522.3 |

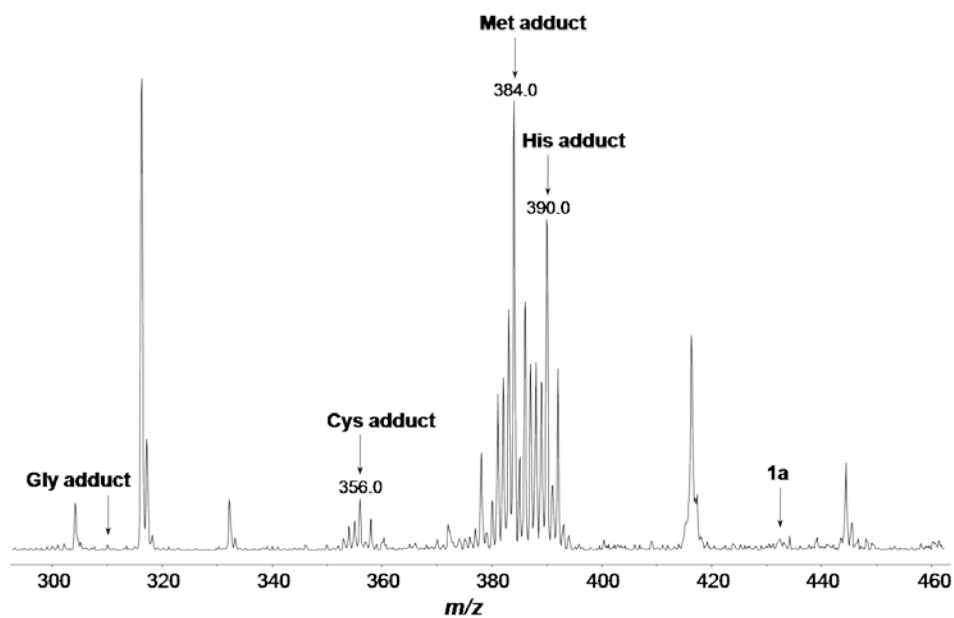

**Figure S2.** ESI mass spectrum for the competitive reaction of **1a** with Gly, His, Met and Cys.

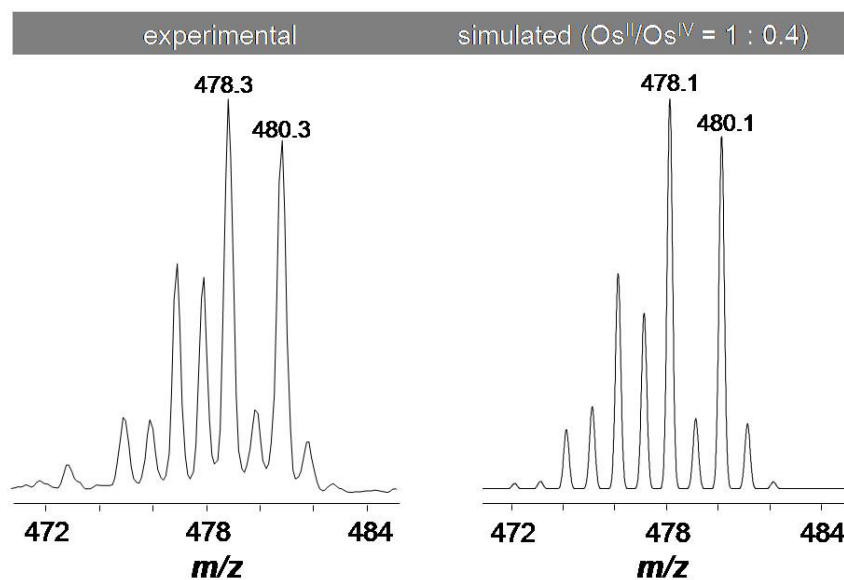

**Figure S3.** Redox processes observed in the mass spectrum of **4a/His**.

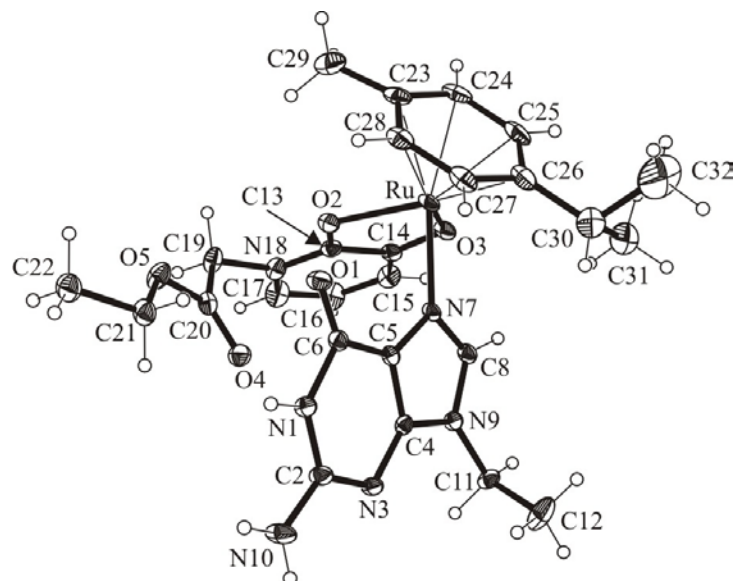

**Figure S4.** ORTEP plot of **5a** at 50% probability level.

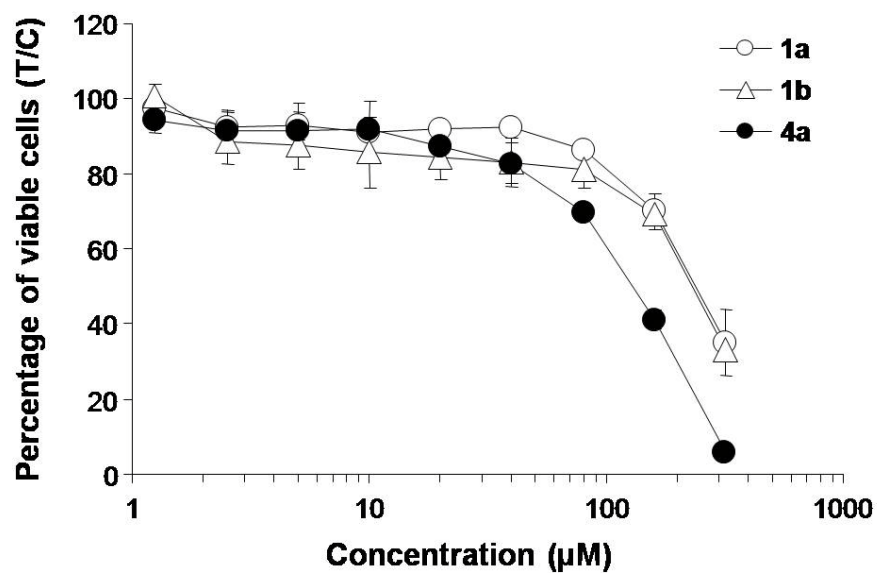

**Figure S5.** Concentration–effect curves of **1a**, **1b** and **4a** in CH1 ovarian cancer cells in the MTT assay (96 h exposure). Values are the means  $\pm$  standard deviations from three independent experiments.

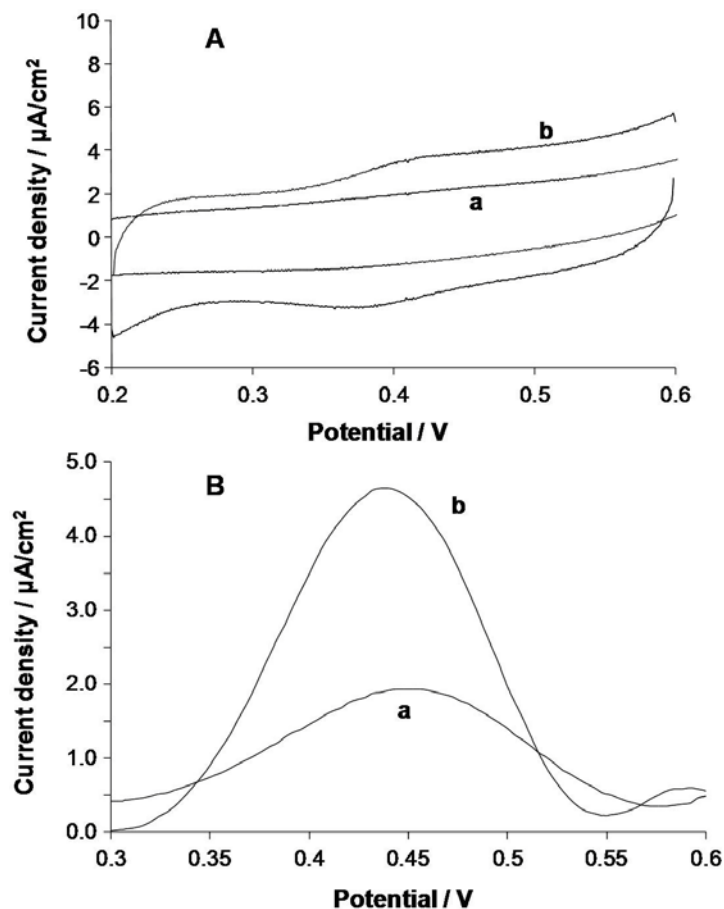

**Figure S6.** Cyclic voltammograms (A) and square-wave voltammograms (B) of 100  $\mu\text{M}$  substrate peptide-modified Au surface electrodes for detection of CDK2/Cyclin A kinase (1  $\mu\text{g}/\text{ml}$ ) phosphorylation reactions. (a) in the presence of roscovitine (20  $\mu\text{M}$ ) and (b) in the absence of roscovitine. Measurements were taken in 0.1 M phosphate buffer solution (pH 7.4) versus Ag/AgCl as reference electrode and Pt wire as counter electrode at 100 mV/s.

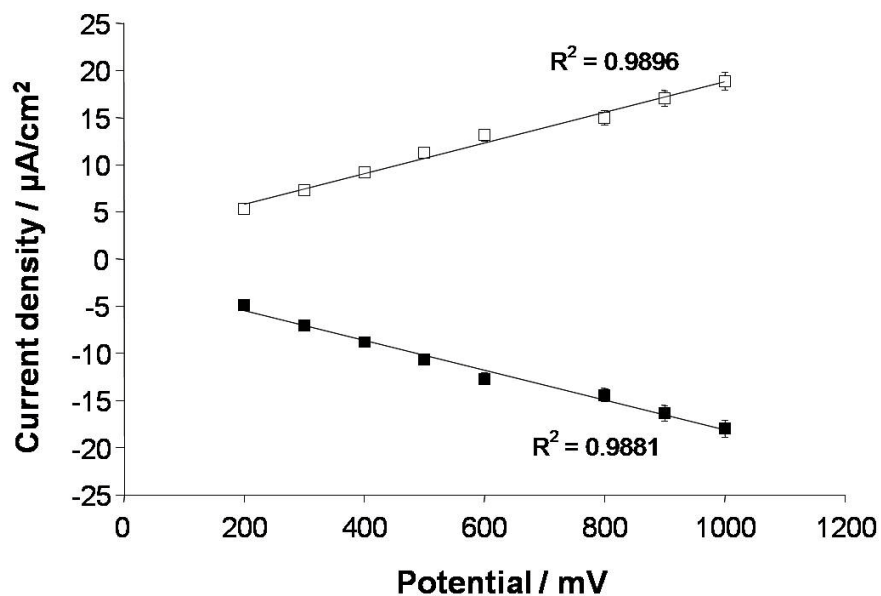

**Figure S7.** Plot of anodic and cathodic current density vs. scan rate in CDK2/Cyclin A kinase assay.

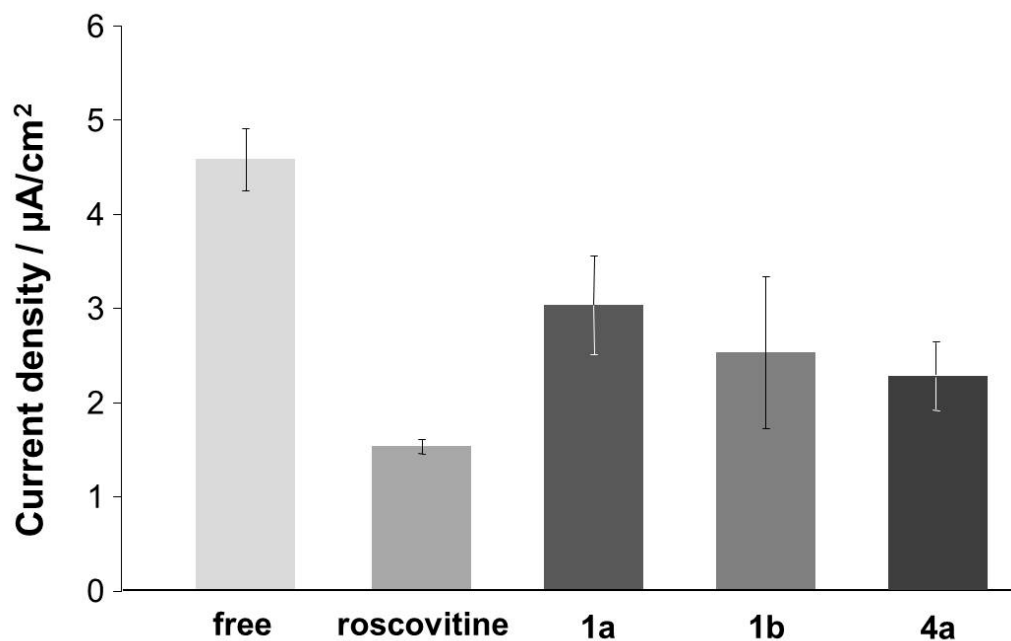

**Figure S8.** Plot for dependence of integrated current density in CDK2/Cyclin A kinase assays as a function of inhibitor type (inhibitor concentration = 20  $\mu\text{M}$  in kinase buffer, 100 mV/s, 0.1 M phosphate buffer pH 7.4, triplicate measurements).
